# Supplementary material for: Macrophage-Derived Extracellular Vesicle Promotes Hair Growth
Source: PubMed Central journal article supplement (PMC7226775; doi:10.3390/cells9040856), 2020-04-01
Supplement: cells-09-00856-s001.pdf [file cells-09-00856-s001.pdf]

# Macrophage-Derived Extracellular Vesicle Promotes Hair Growth

Ramya Lakshmi Rajendran <sup>1,2,†</sup>, Prakash Gangadaran <sup>1,2,3,†</sup>, Chang Hoon Seo <sup>4</sup>, Mi Hee Kwack <sup>5</sup>, Ji Min Oh <sup>1,2,3</sup>, Ho Won Lee <sup>1,2</sup>, Arunnehr Gopal <sup>1,2</sup>, Young Kwan Sung <sup>5</sup>, Shin Young Jeong <sup>1,2</sup>, Sang-Woo Lee <sup>1,2</sup>, Jaetae Lee <sup>1,2</sup> and Byeong-Cheol Ahn <sup>1,2,3,\*</sup>

<sup>1</sup> Department of Nuclear Medicine, School of Medicine, Kyungpook National University, Daegu, Republic of Korea.

<sup>2</sup> Department of Nuclear Medicine, Kyungpook National University Hospital, Daegu, Republic of Korea.

<sup>3</sup> BK21 Plus KNU Biomedical Convergence Program, Department of Biomedical Science, School of Medicine, Kyungpook National University, Daegu, Republic of Korea.

<sup>4</sup> New Drug Development Center, Daegu-Gyeongbuk Medical Innovation Foundation (DGMIF), Daegu, Republic of Korea.

<sup>5</sup> Department of Immunology, School of Medicine, Kyungpook National University, Daegu, Republic of Korea.

<sup>†</sup> These authors contributed equally to this study

\*Correspondence: abc2000@knu.ac.kr

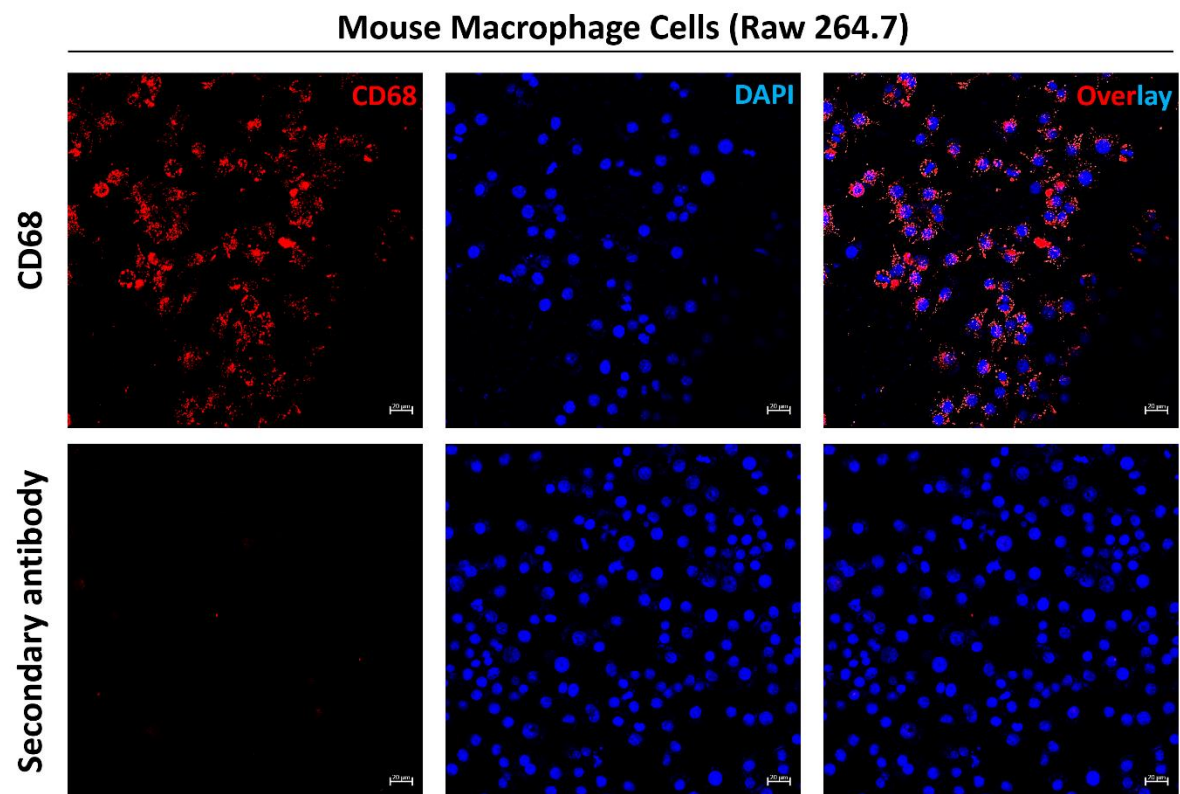

**Figure S1.** Immunofluorescence analysis of CD68 in murine macrophage cell (Raw 264.7) (scale bar, 20  $\mu$ m).

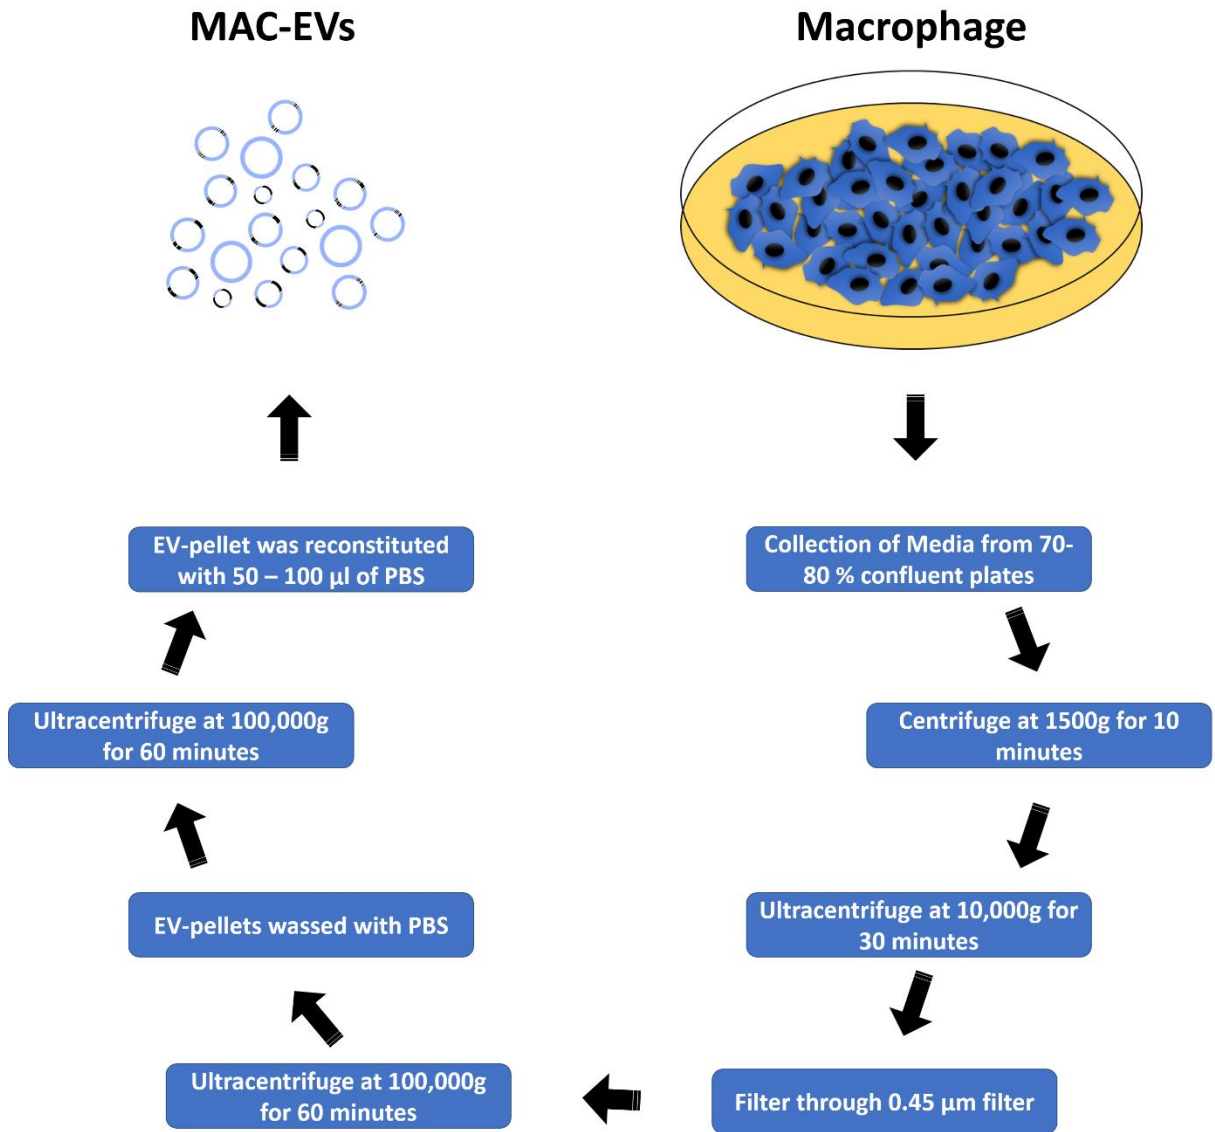

**Figure S2.** Schematic diagram of the generation and purification of MAC-EVs.

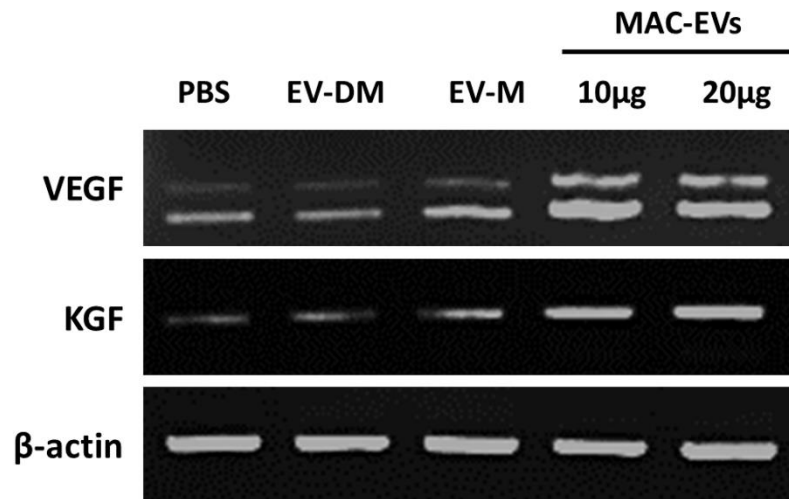

**Figure S3.** Effects of MAC-EVs expression of growth factors in DP cells. Gel image of reverse transcription polymerase chain reaction (RT-PCR) gene expression of DP cells treated with MAC-EVs for 24 h.

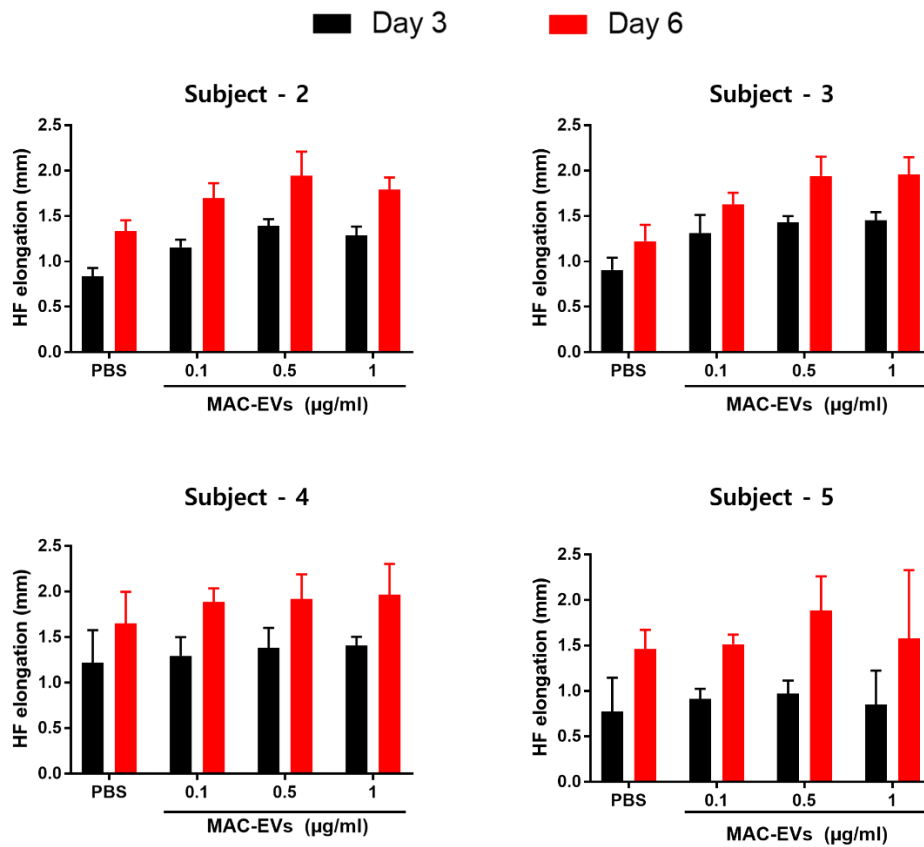

**Figure S4.** MAC-EVs promotes the hair follicle shaft elongation in human. Quantified data of hair shaft elongation ( $n = 5-8$ ) in day 3 and day 6. Mean  $\pm$  SD of experiments are shown. Two-way ANOVA was used.

### Subject - 2

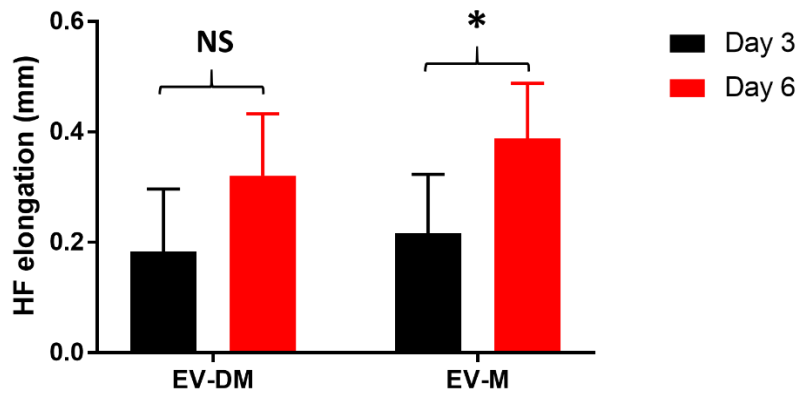

### Subject - 3

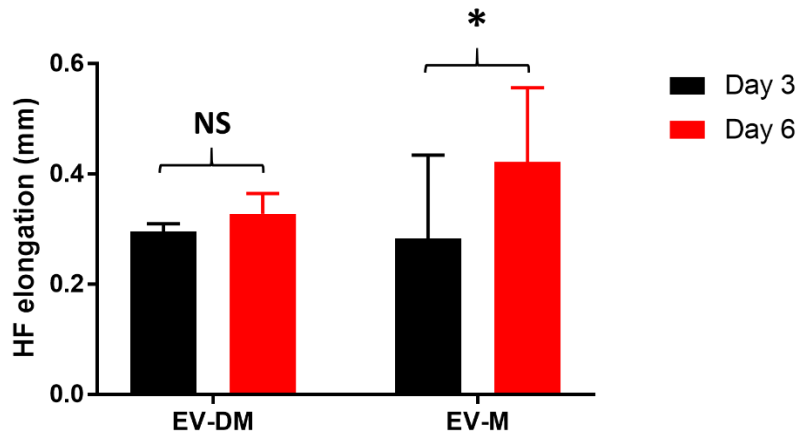

**Figure S5.** EV-M promotes the shaft elongation in human hair follicles. Quantified data of hair shaft elongation ( $n = 5-8$ ) in day 3 and day 6. Mean  $\pm$  SD of experiments are shown. *Student-t-test* was used. EV-DM: EV depleted Media, EV-M: media contains EVs.

**Table1.** List of antibodies used in this study.

| Antibody                               | Company        | Dilution         |                    |
|----------------------------------------|----------------|------------------|--------------------|
|                                        |                | Western blotting | Immunofluorescence |
| ALIX                                   | Abcam          | 1:5000           |                    |
| CD63                                   | Abcam          | 1:5000           |                    |
| TSG101                                 | Abcam          | 1:8000           |                    |
| GM130                                  | Abcam          | 1:4000           |                    |
| Calnexin                               | Abcam          | 1:4000           |                    |
| Cytochrome C                           | Abcam          | 1:4000           |                    |
| $\beta$ -catenin                       | Cell signaling | 1:4000           | 1: 500             |
| Versican                               | Abcam          | 1:4000           | 1: 400             |
| ALP                                    | Abcam          | 1:4000           | 1: 400             |
| pAKT                                   | Cell signaling | 1:5000           |                    |
| AKT                                    | Cell signaling | 1:5000           |                    |
| Bcl-2                                  | Cell signaling | 1:8000           |                    |
| PCNA                                   | Cell signaling | 1:6000           |                    |
| GAPDH                                  | Cell signaling | 1:10000          |                    |
| $\beta$ -actin                         | Cell signaling | 1:6000           |                    |
| Wnt3a                                  | Abcam          | 1:4000           | 1 :200             |
| Wnt7b                                  | GeneTex        | 1:4000           | 1 :200             |
| CD68                                   | Abcam          |                  | 1: 200             |
| HRP conjugated anti-mouse              | Cell signaling | 1:10000          |                    |
| HRP conjugated anti-rabbit             | Cell signaling | 1:10000          |                    |
| Alexa Fluor 555 conjugated anti-rabbit | Cell signaling |                  | 1:200              |
| Anti-goat rabbit -FITC                 | Cell signaling |                  | 1:400              |

**Table 2.** RT-PCR primers list.

| Gene           | Forward               | Reverse              |
|----------------|-----------------------|----------------------|
| VEGF           | GCGAGTCTGTGTTTTTGCAG  | TCTTCAAGCCATCCTGCGTG |
| KGF            | AATTCCAAC TGCCACTGTCC | GACATGGATCCTGCCAACTT |
| $\beta$ -actin | GGGAAATCGTGCGTGACATT  | GGAGTTGAAGGTAGTTTCGT |

**Table 3.** Quantitative PCR primers list.

| Gene           | Forward                | Reverse              |
|----------------|------------------------|----------------------|
| Axin2          | AGCTAGGAGTGCGTTCATGGTT | GGAGGGACGTAGTGCAAAGC |
| LEF1           | CAGGAGCCCTACCACGACAA   | CCTCCATCTGGATGCTTTCC |
| $\beta$ -actin | GGGAAATCGTGCGTGACATT   | GGAGTTGAAGGTAGTTTCGT |
